# Supplementary material for: Ionic and cellular mechanisms underlying TBX5/PITX2 insufficiency-induced atrial fibrillation: Insights from mathematical models of human atrial cells
Source: PubMed Central journal article supplement (PMC6199257; doi:10.1038/s41598-018-33958-y), 2018-10-23
Supplement: 41598_2018_33958_MOESM4_ESM.pdf [file 41598_2018_33958_MOESM4_ESM.pdf]

1 **Ionic and cellular mechanisms underlying TBX5/PITX2 insufficiency-induced atrial**  
2 **fibrillation: Insights from mathematical models of human atrial cells**

3  
4  
5

6 Jieyun Bai<sup>1,5\*</sup>, Patrick A. Gladding<sup>2</sup>, Martin K. Stiles<sup>3</sup>, Vadim V. Fedorov<sup>4</sup> & Jichao Zhao<sup>1\*</sup>

7 <sup>1</sup> Auckland Bioengineering Institute, The University of Auckland, Auckland, New Zealand

8 <sup>2</sup> Department of Cardiology, Waitemata District Health Board, Auckland, New Zealand

9 <sup>3</sup> Waikato Hospital, Hamilton, New Zealand

10 <sup>4</sup> Department of Physiology and Cell Biology, The Ohio State University Wexner Medical Center,  
11 Columbus, United States of America

12 <sup>5</sup> School of Computer Science and Technology, Harbin Institute Technology, Harbin, China

13  
14

15

16 \*Correspondence and requests for materials should be addressed to J.Z. (j.zhao@auckland.ac.nz)

17 or J.B. (jieyun.bai@auckland.ac.nz)

18

19

20

21

22

23

24 Methods

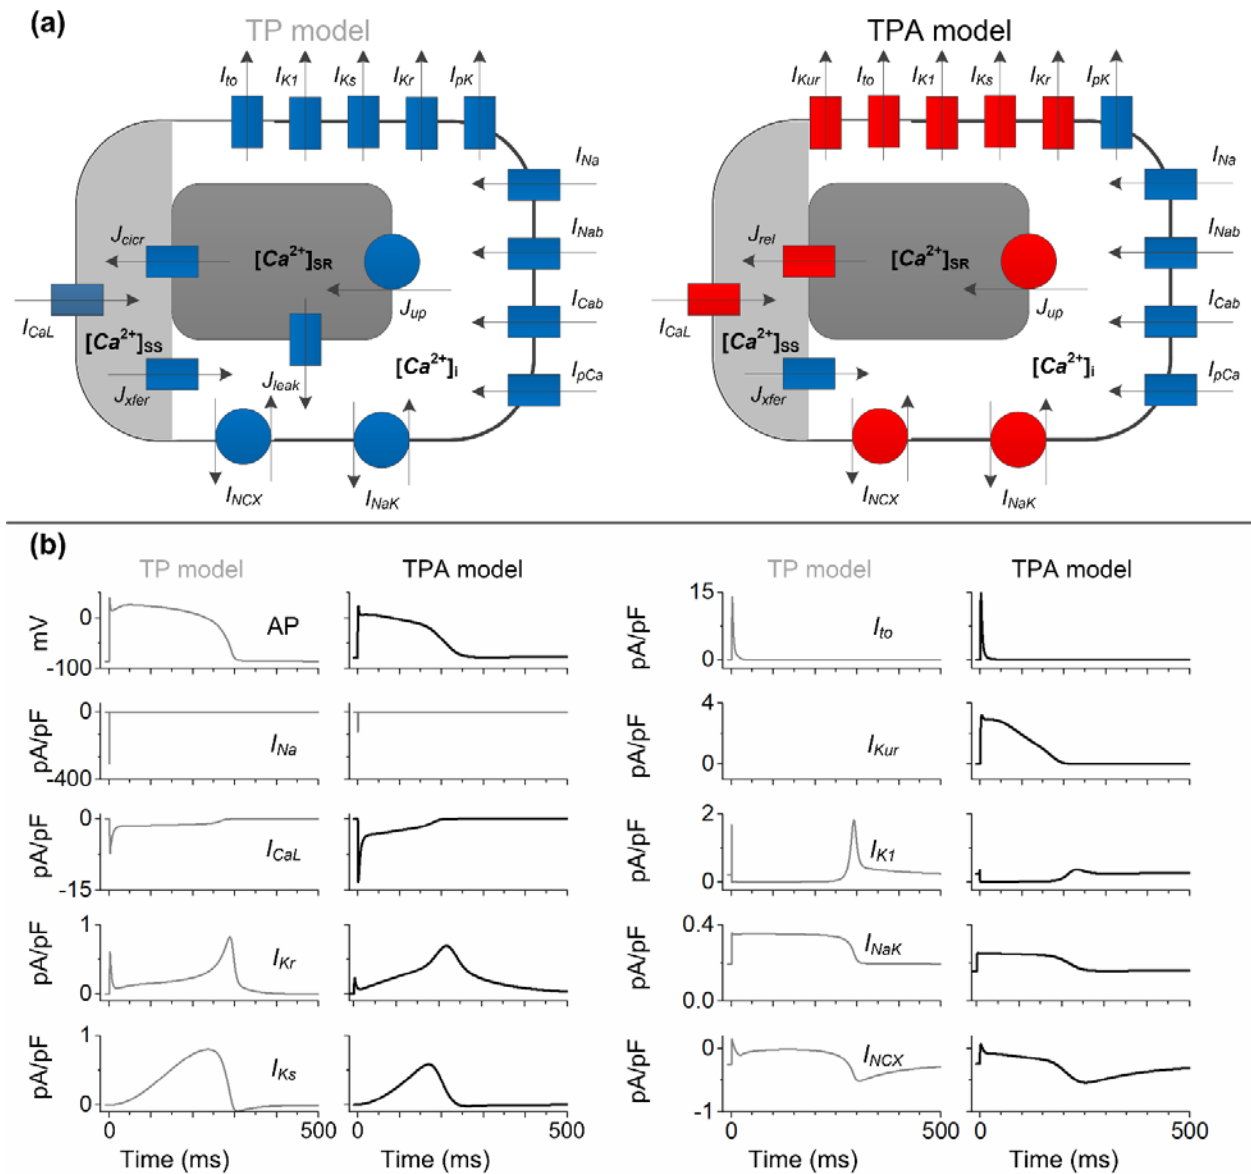

25

26 **Supplementary Figure S1. Intracellular structure, action potential (AP) and major**  
 27 **underlying currents for ventricular ten Tusscher-Panfilov (TP) model and our human atrial**  
 28 **(TPA) model. (a)** Outlines the main changes made to the TP model to generate the TPA model  
 29 and schematic of the cell membrane, including the different modeled ionic currents and  
 30 intracellular ion concentrations. L-type calcium current ( $I_{CaL}$ ), rapid delayed rectifier potassium  
 31 current ( $I_{Kr}$ ), slow delayed rectifier potassium current ( $I_{Ks}$ ), transient outward potassium current

32 ( $I_{to}$ ), ultrarapid delayed rectifier potassium current ( $I_{Kur}$ ), inward rectifier potassium current ( $I_{K1}$ ),  
33 sodium-potassium pump current ( $I_{NaK}$ ), sodium calcium exchange current ( $I_{NCX}$ ) and the calcium  
34 flow ( $J_{up}$ ) through the sarcoplasmic reticulum (SR) calcium ATPase (SERCA) and SR calcium  
35 release flow ( $J_{rel}$ ) (including both calcium-induced-calcium release ( $J_{cicr}$ ) and SR calcium leak  
36 ( $J_{leak}$ )) are changed (marked in red). Fast sodium current ( $I_{Na}$ ), background sodium current ( $I_{Nab}$ ),  
37 background calcium current ( $I_{Cab}$ ), plateau potassium current ( $I_{pK}$ ), plateau calcium current ( $I_{pCa}$ )  
38 and diffusive calcium current ( $I_{xfer}$ ) between dyadic subspace and bulk cytoplasm are not changed  
39 (marked in blue). Here,  $[Ca^{2+}]_{SR}$  is the concentration of calcium ion in sub-cellular compartment SR  
40 (mM),  $[Ca^{2+}]_{SS}$  is the concentration of calcium ion in sub-cellular compartment dyadic cleft (SS)  
41 and  $[Ca^{2+}]_i$  is the cytosolic calcium concentration. **(b)** Steady-state action potential (AP) and the  
42 major underlying currents at a pacing frequency of 1Hz. Thicker traces represent voltage or  
43 currents for which maximal conductance or pump rate was changed to generate the TPA model  
44 from the TP model.

45 **Supplementary Table S1. Differences between the utilized parameters in the ten Tusscher-**  
46 **Panfilov (TP) model and our human atrial (TPA) model.**

| Parameter | Definition                           | Value (TP)                                        | Value (TPA)                                       | Ref.                   |
|-----------|--------------------------------------|---------------------------------------------------|---------------------------------------------------|------------------------|
| $G_{CaL}$ | Maximal $I_{CaL}$ conductance        | 0.0000398 cm $\cdot$ ms $^{-1}\cdot\mu$ F $^{-1}$ | 0.0000597 cm $\cdot$ ms $^{-1}\cdot\mu$ F $^{-1}$ | Human <sup>1,2</sup>   |
| $G_{K1}$  | Maximal $I_{K1}$ conductance         | 5.405 nS/pF                                       | 1.081 nS/pF                                       | Human <sup>2,3</sup>   |
| $G_{to}$  | Maximal $I_{to}$ conductance         | 0.294 nS/pF                                       | 0.588 nS/pF                                       | Human <sup>2,3</sup>   |
| $G_{Kr}$  | Maximal $I_{Kr}$ conductance         | 0.153 nS/pF                                       | 0.1989 nS/pF                                      | ↓                      |
| $G_{Ks}$  | Maximal $I_{Ks}$ conductance         | 0.392 nS/pF                                       | 0.784 nS/pF                                       | ↓                      |
| $K_{NaK}$ | Maximal $I_{NaK}$                    | 2.724 pA/pF                                       | 1.9068 pA/pF                                      | Human <sup>1,2,4</sup> |
| $K_{NCX}$ | Maximal $I_{NCX}$                    | 1000 pA/pF                                        | 700 pA/pF                                         | Human <sup>1,2,4</sup> |
| $K_{sat}$ | Saturation factor for $I_{NCX}$      | 0.1                                               | 0.08                                              |                        |
| $K_{up}$  | Half-saturation constant of $J_{up}$ | 0.00025 mM                                        | 0.0005 mM                                         | Human <sup>1</sup>     |

47 ↓ Values optimized to reproduce the best action potential (AP) shape.

48

49

50 **Development of our human atrial model (TPA):** The changes made to the ten Tusscher-Panfilov  
 51 (TP)<sup>5</sup> model to generate our human atrial (TPA) model include alterations listed in the  
 52 **Supplementary Table S1**, Maleckar et al.  $I_{Kur}$ <sup>6</sup> and modified calcium handling<sup>7,8</sup>(see **Methods**  
 53 for details). Intracellular structure (**Supplementary Fig. S1(a)**), AP morphology and key  
 54 underlying ionic channels (**Supplementary Fig. S1(b)**) of the TP model were compared side by  
 55 side to those of the TPA model.

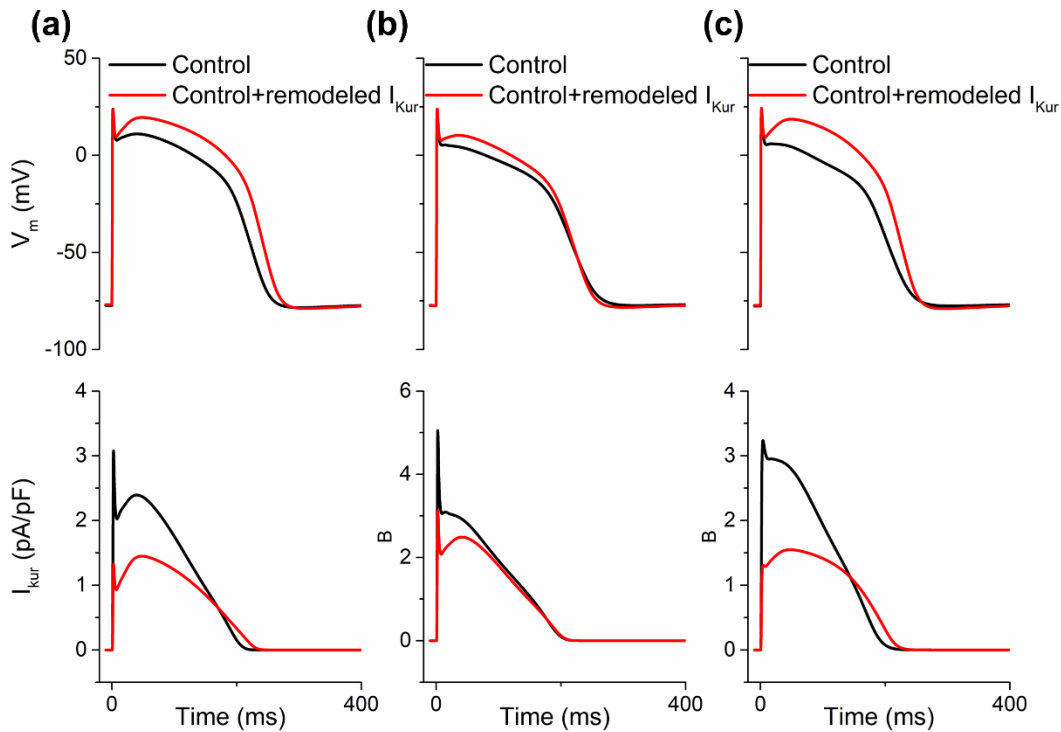

56  
 57 **Supplementary Figure S2. Changes in action potential due to TBX5-induced  $I_{kur}$  remodeling**  
 58 **using different formations of  $I_{kur}$ .** Action potential and  $I_{kur}$  under control and remodeled  $I_{kur}$   
 59 conditions using  $I_{kur}$  of the Courtemanche et al. model (a), the Aguilar et al. model (b) and the  
 60 Maleckar et al. model (c). A reduction of  $I_{kur}$  due to TBX5 insufficiency led to prolongation of the  
 61 atrial action potential.

62 **Formulation of  $I_{Kur}$ :** The  $I_{Kur}$  formulation in the TPA model was taken from the Maleckar et al.'s  
 63 model<sup>6</sup>. In order to validate our TPA model, we also took into account all of the existing  $I_{Kur}$   
 64 models. These models include those adopted in previous simulation studies conducted by  
 65 Courtemanche et al.<sup>9</sup>, Aguilar et al.<sup>10</sup>, and Maleckar et al.<sup>6</sup> Although different  $I_{kur}$  models were

66 used in our TPA model, it did not change the fact that reduction of  $I_{Kur}$  due to TBX5 insufficiency  
 67 leads to prolongation of atrial action potentials (**Supplementary Fig. S2**). Equations and  
 68 parameters for  $I_{Kur}$  in the Courtemanche et al. model are given by

$$69 \quad X_{Kur,\infty} = \frac{1.0}{1.0 + e^{\frac{(V_m+30.3)}{-9.6}}} \quad (1)$$

$$70 \quad Y_{Kur,\infty} = \frac{1.0}{1.0 + e^{\frac{(V_m-99.45)}{27.48}}} \quad (2)$$

$$71 \quad \alpha_X = 0.65 \left[ e^{-\frac{(V_m+10)}{8.5}} + e^{-\frac{(V_m-30)}{59.0}} \right]^{-1} \quad (3)$$

$$72 \quad \beta_X = 0.65 \left[ 2.5 + e^{\frac{(V_m+82)}{17.0}} \right]^{-1} \quad (4)$$

$$73 \quad \tau_X = [\alpha_X + \beta_X]^{-1}/K_{Q10} \quad (5)$$

$$74 \quad \alpha_Y = \left[ 1 + e^{-\frac{(V_m+30.3)}{9.6}} \right]^{-1} \quad (6)$$

$$75 \quad \beta_Y = \left[ 21.0 + e^{-\frac{(V_m-185.0)}{16.0}} \right]^{-1} \quad (7)$$

$$76 \quad \tau_Y = [\alpha_Y + \beta_Y]^{-1}/K_{Q10} \quad (8)$$

$$77 \quad G_{Kur} = 0.005 + \frac{0.05}{1.0 + e^{\frac{(V_m-15.0)}{-13}}} \quad (9)$$

$$78 \quad I_{Kur} = G_{Kur} \cdot X_{Kur} \cdot X_{Kur} \cdot X_{Kur} \cdot Y_{Kur} \cdot (V_m - E_K) \quad (10)$$

79

80 Equations and parameters for  $I_{Kur}$  in the Aguilar et al. model are given by

$$81 \quad X_{Kur,\infty} = \frac{1.0}{1.0 + e^{\frac{(V_m+30.3)}{-9.6}}} \quad (11)$$

$$82 \quad Y_{Kur,\infty} = \frac{1.0}{1.0 + e^{\frac{(V_m+5.0)}{5.0}}} \quad (12)$$

83

$$84 \quad Z_{Kur,\infty} = \frac{1.0}{1.0 + e^{\frac{(V_m - 35.0)}{20.0}}} \quad (13)$$

$$85 \quad \alpha_X = 0.65 \left[ e^{-\frac{(V_m + 10)}{8.5}} + e^{-\frac{(V_m - 30)}{59.0}} \right]^{-1} \quad (14)$$

$$86 \quad \beta_X = 0.65 \left[ 2.5 + e^{\frac{(V_m + 82)}{17.0}} \right]^{-1} \quad (15)$$

$$87 \quad \tau_X = [\alpha_X + \beta_X]^{-1} / K_{Q10} \quad (16)$$

$$88 \quad \tau_Y = 5800 \left[ 1.0 + e^{-\frac{(V_m + 80.0)}{11.0}} \right]^{-1} \quad (17)$$

$$89 \quad \tau_Z = 800 \left( 2.0 - \frac{V_m}{40} \right) \quad (18)$$

$$90 \quad G_{Kur} = 0.005 + \frac{0.05}{1.0 + e^{\frac{(V_m - 15.0)}{-13}}} \quad (19)$$

$$91 \quad I_{Kur} = G_{Kur} \cdot X_{Kur} \cdot X_{Kur} \cdot X_{Kur} \cdot Y_{Kur} \cdot Z_{Kur} (V_m - E_K) \quad (20)$$

92

93 Equations and parameters for  $I_{Kur}$  in the Maleckar et al. model are governed by

$$94 \quad X_{Kur,\infty} = \frac{1.0}{1.0 + e^{-(V_m + 6.0)/8.6}} \quad (21)$$

$$95 \quad Y_{Kur,\infty} = \frac{1.0}{1.0 + e^{(V_m + 7.5)/10.0}} \quad (22)$$

$$96 \quad \tau_X = \frac{9.0}{1.0 + e^{(V_m + 5.0)/12.0}} + 0.5 \quad (23)$$

$$97 \quad \tau_Y = \frac{590.0}{1.0 + e^{(V_m + 60.0)/10.0}} + 3050.0 \quad (24)$$

$$98 \quad G_{Kur} = 0.045 \text{ nS/pF} \quad (25)$$

$$99 \quad I_{Kur} = G_{Kur} \cdot X_{Kur} \cdot Y_{Kur} \cdot (V_m - E_K) \quad (26)$$

100

101 Although the  $I_{Kur}$  model is based on that of Maleckar et al.'s model, the width of the  $I_{Kur}$  peak in  
 102 the TPA model is different from that in the Maleckar et al. model. This discrepancy is likely due

103 to the different action potential types used between the TPA model (spike-and-dome-type action  
 104 potential) and the Maleckar et al. model (spike-and-no-dome-type action potential). The action  
 105 potential type between our TPA model and the CRN model is the same, as shown in the  
 106 **Supplementary Fig. S3**, the action potential,  $I_{Kur}$  and  $I_{to}$  of the TPA model are similar to that of  
 107 the CRN model. When spike-and-no-dome-type action potentials were created by blocking  $I_{CaL}$  in  
 108 the TPA and CRN models, a resultant  $I_{Kur}$  similar to that of the Maleckar et al. model was obtained.

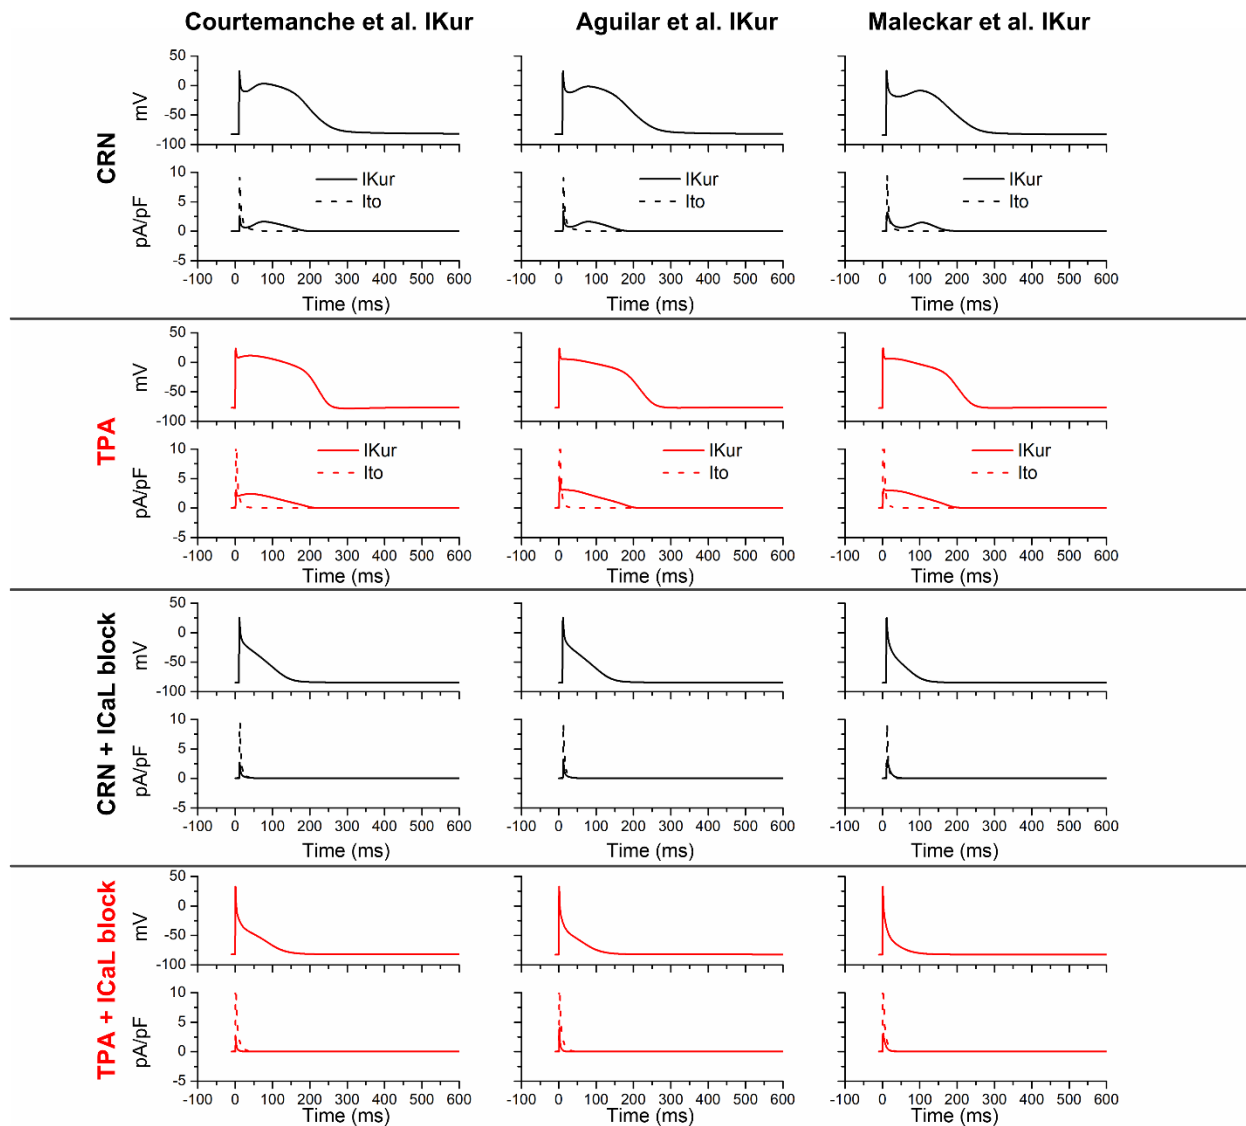

109  
 110 **Supplementary Figure S3. Action potential,  $I_{Kur}$  and  $I_{to}$  of the CRN and TPA models, and**  
 111 **the effects of  $I_{CaL}$ .**

113 **Electrophysiological modeling of TBX5/PITX2 insufficiency:** According to changes in gene  
 114 expression of TBX5/PITX2 observed in experiments, five different scenarios were considered:  
 115 homozygous TBX5-knockout (Hom-Tbx5), heterozygous TBX5-knockout (Het-Tbx5),  
 116 homozygous PITX2-knockout (Hom-Pitx2), heterozygous PITX2-knockout (Het-Pitx2) and  
 117 heterozygous knockout of both PITX2 and TBX5 (Het-Pitx2-Tbx5) conditions. Alterations of ion  
 118 currents relative to the TPA model can be found in the **Supplementary Table S2**

119 **Supplementary Table S2.** Review of atrial gene expression abnormalities induced by the Tbx5-  
 120 Pitx2-dependent gene regulatory network

| Process       | Experimental observation |                    |                                                                                                                |                                                                           |                     |
|---------------|--------------------------|--------------------|----------------------------------------------------------------------------------------------------------------|---------------------------------------------------------------------------|---------------------|
|               | Hom-Tbx5                 | Hete-Tbx5          | Hom-Pitx2                                                                                                      | Hete-Pitx2                                                                | Hete-Tbx5-Pitx2     |
| Tbx5 (%)      | ~15% <sup>11</sup>       | ~55% <sup>11</sup> | 100% <sup>12</sup>                                                                                             | ~111% <sup>11</sup>                                                       | ~64% <sup>11</sup>  |
| Pitx2 (%)     | ~53% <sup>11</sup>       | ~91% <sup>11</sup> | ~200% <sup>13</sup> , ~5% <sup>14</sup> , ~10%-<br>20% <sup>15</sup> , 25% <sup>16</sup> and 20% <sup>12</sup> | ~45% <sup>11</sup> , ~30% <sup>14</sup><br>and ~35% <sup>17</sup>         | ~54% <sup>11</sup>  |
| $I_{Na}$ (%)  | ~30% <sup>11</sup>       | ~85% <sup>11</sup> | ~40% <sup>15</sup> and ~50% <sup>16</sup>                                                                      | ~195% <sup>11</sup>                                                       | ~118% <sup>11</sup> |
| $I_{Ks}$ (%)  | -                        | -                  | ~200% <sup>13</sup> and ~300% <sup>12</sup>                                                                    | -                                                                         | -                   |
| $I_{to}$ (%)  | ~35% <sup>11</sup>       | -                  | -                                                                                                              | -                                                                         | -                   |
| $I_{K1}$ (%)  | ~42% <sup>11</sup>       | -                  | ~40% <sup>13</sup> and ~130% <sup>16</sup>                                                                     | -                                                                         | -                   |
| $I_{Kur}$ (%) | ~42% <sup>11</sup>       | -                  | -                                                                                                              | -                                                                         | -                   |
| $I_{CaL}$ (%) | -                        | -                  | ~53% <sup>13</sup> and ~50% <sup>14</sup>                                                                      | ~50% <sup>14</sup> and<br>Decreased <sup>17</sup>                         | -                   |
| SERCA<br>(%)  | ~42% <sup>11</sup>       | ~73% <sup>11</sup> | a major up<br>regulation(~1100%) <sup>14</sup> ,<br>200% <sup>16</sup> and 150% <sup>12</sup>                  | ~110% <sup>11</sup> and a<br>major up regulation<br>(~600%) <sup>14</sup> | ~86% <sup>11</sup>  |
| RyR (%)       | ~22% <sup>11</sup>       | ~59% <sup>11</sup> | a minor up regulation <sup>14</sup> ,<br>130% <sup>16</sup> and 300% <sup>12</sup>                             | ~112% <sup>11</sup> and a<br>minor up<br>regulation <sup>14</sup>         | ~72% <sup>11</sup>  |

121

122 **Validation of the TPA model for reproducing delayed afterdepolarization and spontaneous**  
 123 **depolarization.** To reproduce experimental observations, we simulated the three conditions:  
 124 control ( $G_{KI}=5.405$  nS/pF,  $V_{maxup}=0.006375$  mM/ms), control + increased SR  $Ca^{2+}$  ( $G_{KI}=5.405$



125 nS/pF,  $V_{maxup} = 0.011475$  mM/ms) and control + increased SR  $Ca^{2+}$  + reduced  $I_{K1}$  ( $G_{K1} = 1.081$  nS/pF,  
126  $V_{maxup} = 0.011475$  mM/ms). Action potentials were elicited by the 50<sup>th</sup> stimulus at a cycle length  
127 of 250 ms. As shown in the **Supplementary Fig. S4**, increased SR  $Ca^{2+}$  (leading to DADs) and  
128 the reduced outward current  $I_{K1}$  contributed to diastolic depolarization, resulting in triggered action  
129 potentials.

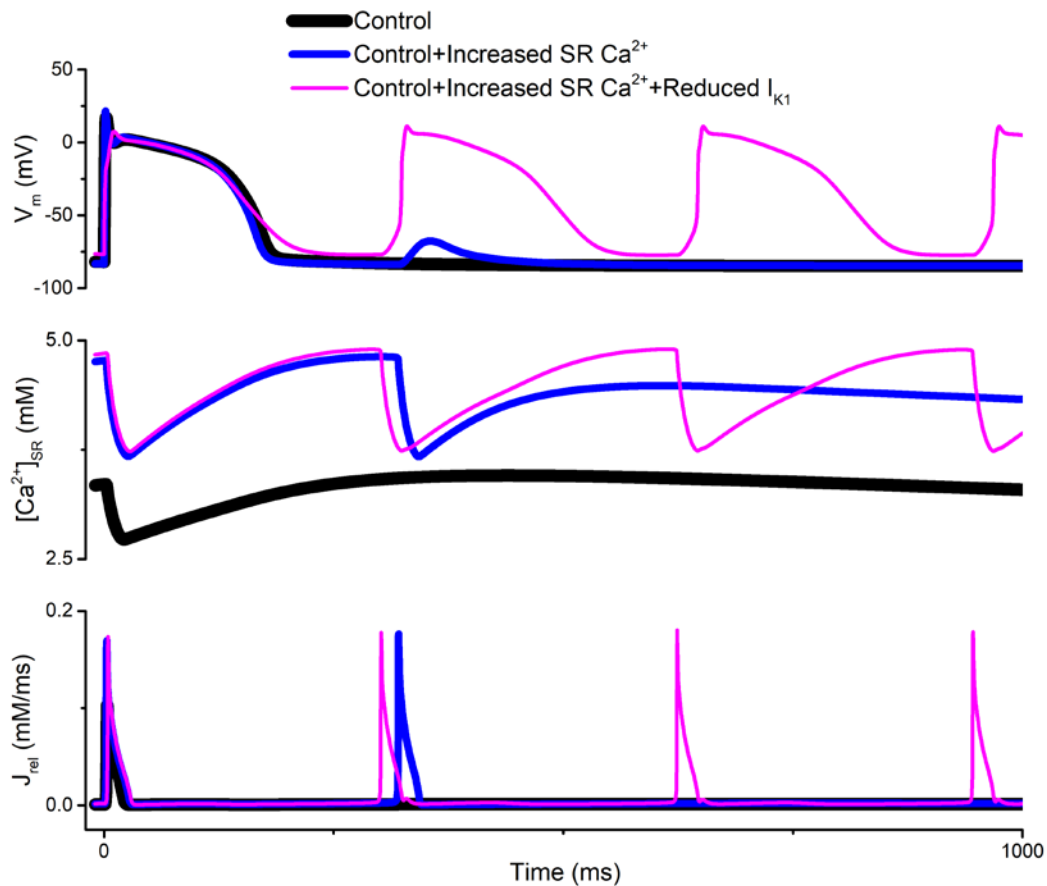

130

131 **Supplementary Figure S4. Effects of increased sarcoplasmic reticulum (SR)  $Ca^{2+}$  and**  
132 **reduced  $I_{K1}$  on the membrane potential.** Compared to the control condition (Black), increased  
133 SR  $Ca^{2+}$  leads to SR  $Ca^{2+}$  leak and delayed afterdepolarizations (DADs) (Blue). Reduced  $I_{K1}$  in  
134 addition to increased SR  $Ca^{2+}$  elevates resting membrane potential which favors the development  
135 of spontaneous depolarizations and DADs (Magenta).

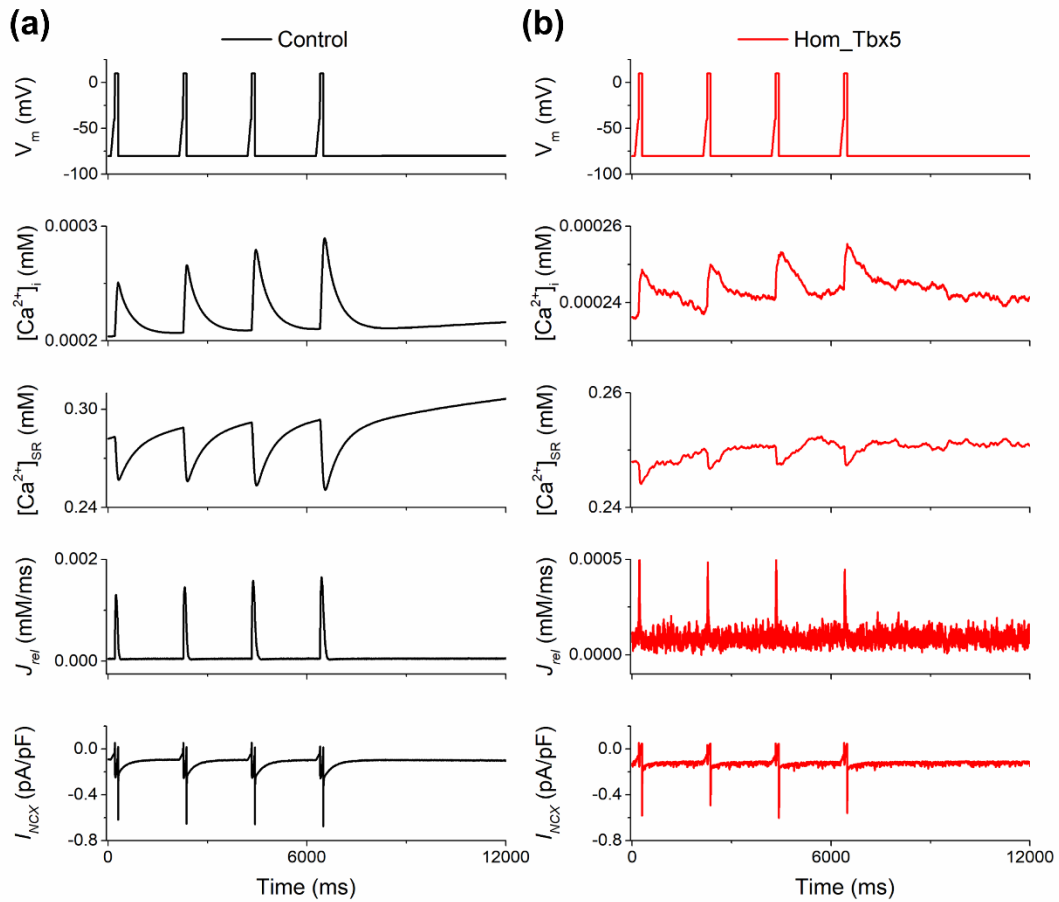

136

137 **Supplementary Figure S5. Electrophysiological properties under control and homozygous**  
 138 **Tbx5-knockout (Hom\_Tbx5) with 50  $\mu\text{mol/L}$  flecainide conditions.** Compared to the control  
 139 condition (a), the diastolic calcium concentration, spontaneous sarcoplasmic reticulum release  
 140 events and activity of sodium-calcium exchangers were increased under the Hom\_Tbx5 condition  
 141 (b).

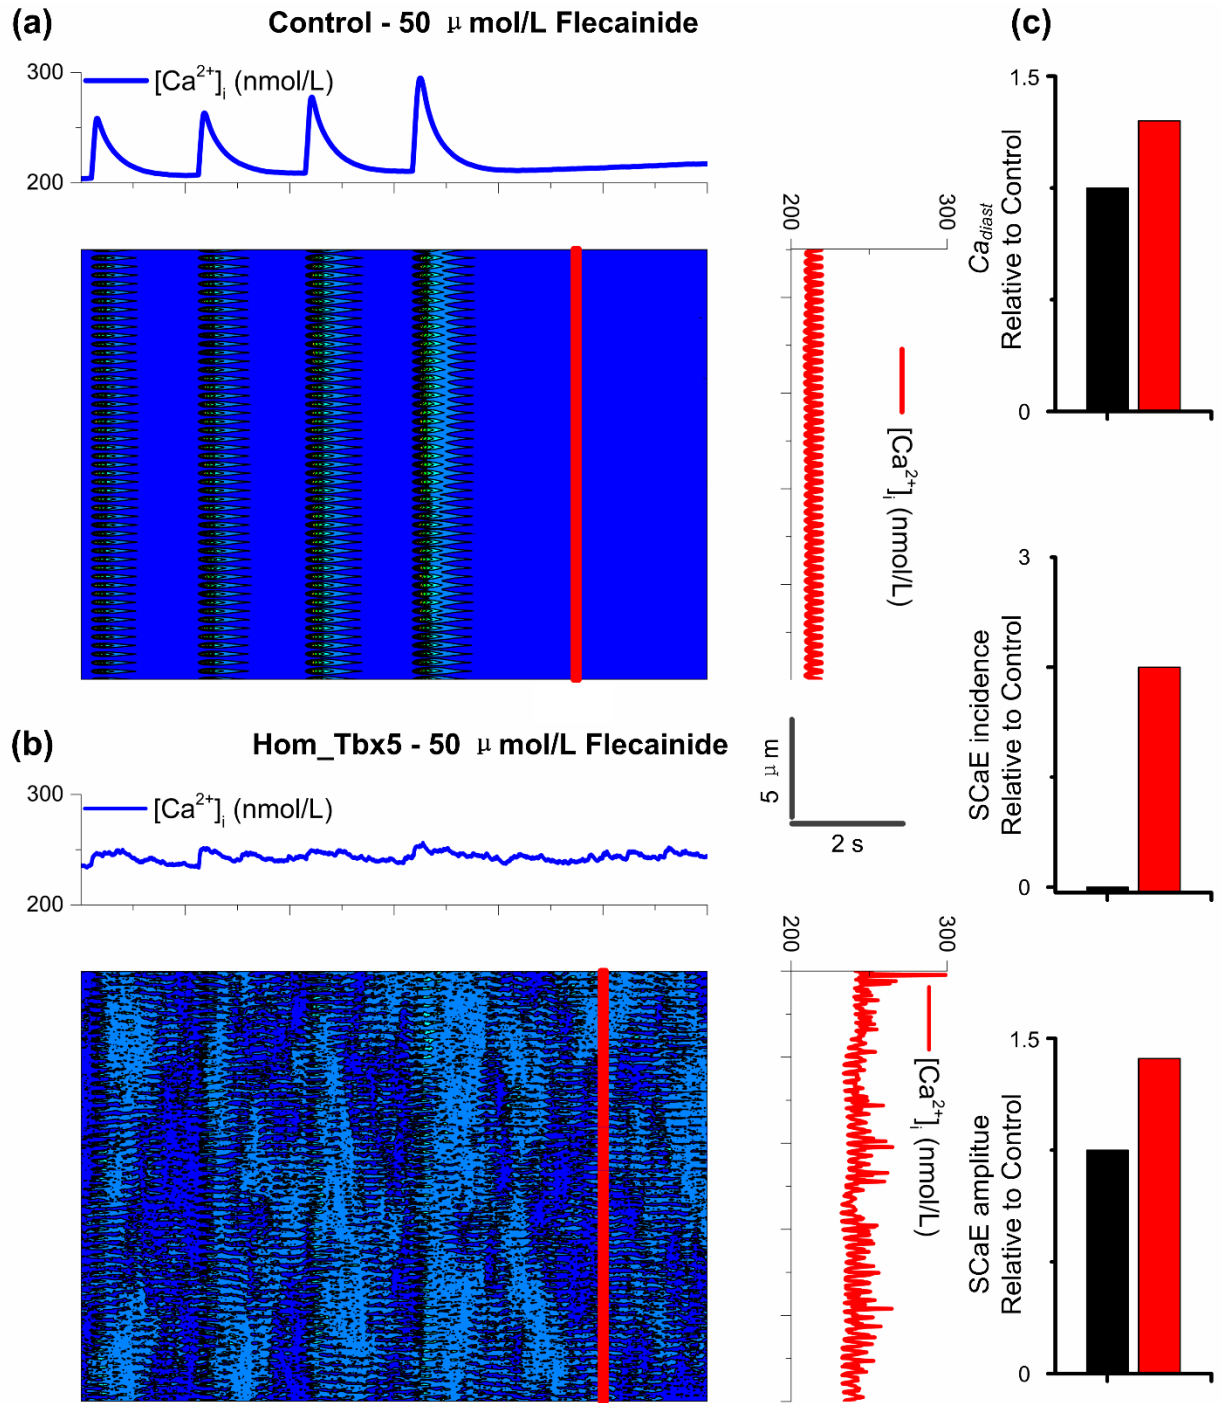

142

143 **Supplementary Figure S6. Spontaneous sarcoplasmic reticulum (SR)-release events (SCaEs)**  
 144 **under control and homozygous *tbx5*-knockout (Hom\_Tbx5) with 50  $\mu$ mol/L flecainide**  
 145 **conditions.** Transverse (Blue) and vertical (Red) line-scan representations of  $[Ca^{2+}]_i$  for the  
 146 control **a)** and Hom\_Tbx5 **b)** models. **c)** The diastolic calcium concentration ( $Ca_{diast}$ ) of SCaEs,

147 SCaEs incidence, and SCaEs amplitude were compared between control and Hom\_Tbx5  
 148 conditions.

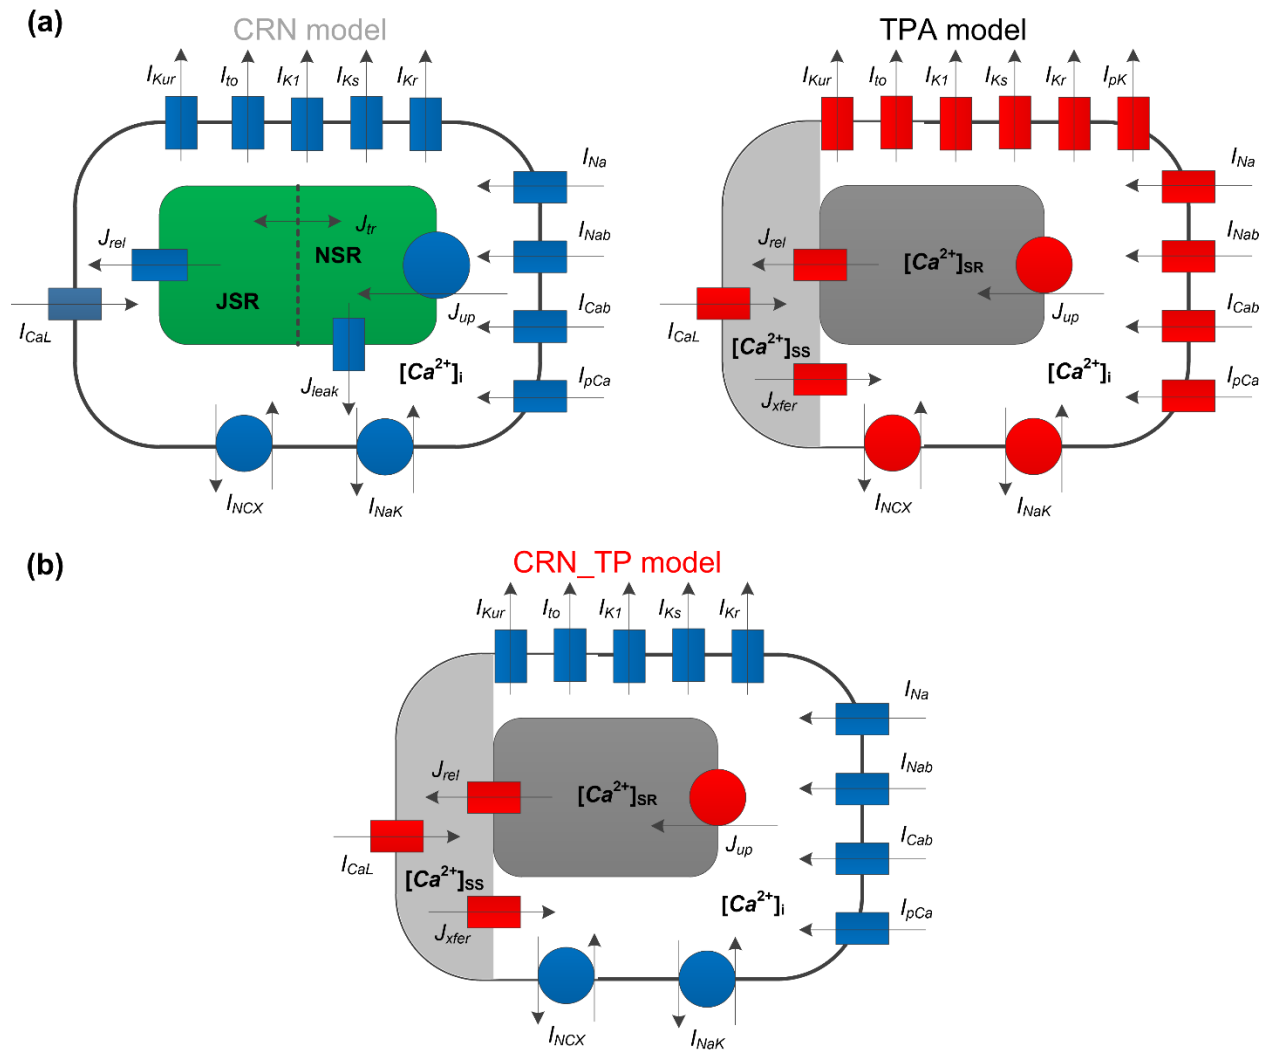

149

150 **Supplementary Figure S7. Intracellular structures of the Courtemanche et al. model (CRN),**  
 151 **our human atrial (TPA) model and a new human atrial model (CRN\_TP) constructed by**  
 152 **integrating the calcium dynamics of our TPA model into the CRN model.** The intracellular  
 153 structure and membrane ionic currents of the CRN (a) and TPA models (b). (c) The CRN\_TP  
 154 model was developed by combining the calcium handling formulations from the TPA model and  
 155 the transmembrane currents of the CRN model. The cell space includes a sub-cellular compartment  
 156 dyadic cleft (SS), the sarcoplasmic reticulum (SR), the cytoplasm and cell membrane.

157

158 ***Model independence of the cellular electrophysiological consequences of TBX5 insufficiency.***

159 In addition to our original TPA cell model, we also used the stochastic model<sup>18</sup> to test the single  
160 cell predictions for cases of TBX5 insufficiency. Under the control condition, spontaneous  $\text{Ca}^{2+}$ -  
161 release events (SCaEs) occurred and 50  $\mu\text{M/L}$  flecainide could completely prevent these SCaEs<sup>18</sup>.  
162 To avoid the influence of these SCaEs,  $[\text{Ca}^{2+}]_i$  was simulated under control and homozygous *tbx5*-  
163 knockout (Hom\_Tbx5) with 50  $\mu\text{mol/L}$  flecainide conditions. Our computer model was altered to  
164 simulate Hom\_Tbx5 by adapting  $I_{Na}$  (-70%),  $I_{to}$  (-65%),  $I_{Kur}$  (-58%),  $I_{K1}$  (-58%),  $J_{up}$  (-58%), and  
165  $J_{rel}$  (-78%) (see **Supplementary Table S2** for details). Action potentials were elicited at a cycle  
166 length of 2046 ms. The TBX5-induced electrical remodeling led to decreased systolic  $[\text{Ca}^{2+}]_i$ ,  
167 increased diastolic calcium concentration ( $\text{Ca}_{\text{diast}}$ ) and increased SR- $\text{Ca}^{2+}$  leak (**Supplementary**  
168 **Fig. S5 and S6**), supporting our conclusion that increased SR- $\text{Ca}^{2+}$  leak contributes to atrial  
169 arrhythmogenesis.

170 We also developed a new human atrial model (CRN\_TP) by integrating the calcium dynamics of  
171 our TPA model into the Courtemanche et al. model (CRN). The intracellular structure of the  
172 CRN\_TP model was compared to those of the CRN and TPA models (**Supplementary Fig. S7**).  
173 As shown in **Supplementary Fig. S8(a)**, the action potential shape of the CRN\_TP model was  
174 similar to that of the CRN model, but the amplitude of  $[\text{Ca}^{2+}]_i$  in the CRN\_TP model was larger  
175 than that of the CRN model.

176 To reproduce experimental observations, we simulated the three conditions: control ( $V_{\text{maxup}} =$   
177  $0.006375 \text{ mM/ms}$ ), control + increased SR  $\text{Ca}^{2+}$  ( $V_{\text{maxup}} = 0.0082875 \text{ mM/ms}$ ) and control +  
178 increased SR  $\text{Ca}^{2+}$  + reduced  $I_{K1}$  (80% reduction of  $G_{K1}$ ,  $V_{\text{maxup}} = 0.0082875 \text{ mM/ms}$ ). Action  
179 potentials were elicited by the 50<sup>th</sup> stimulus at a cycle length of 500 ms. As shown in the  
180 **Supplementary Fig. S8**, the increased SR  $\text{Ca}^{2+}$  (leading to inward  $I_{\text{NCX}}$  and triggered action  
181 potential) and the reduced outward current  $I_{K1}$  contribute to diastolic depolarization, resulting in  
182 triggered action potentials.

183

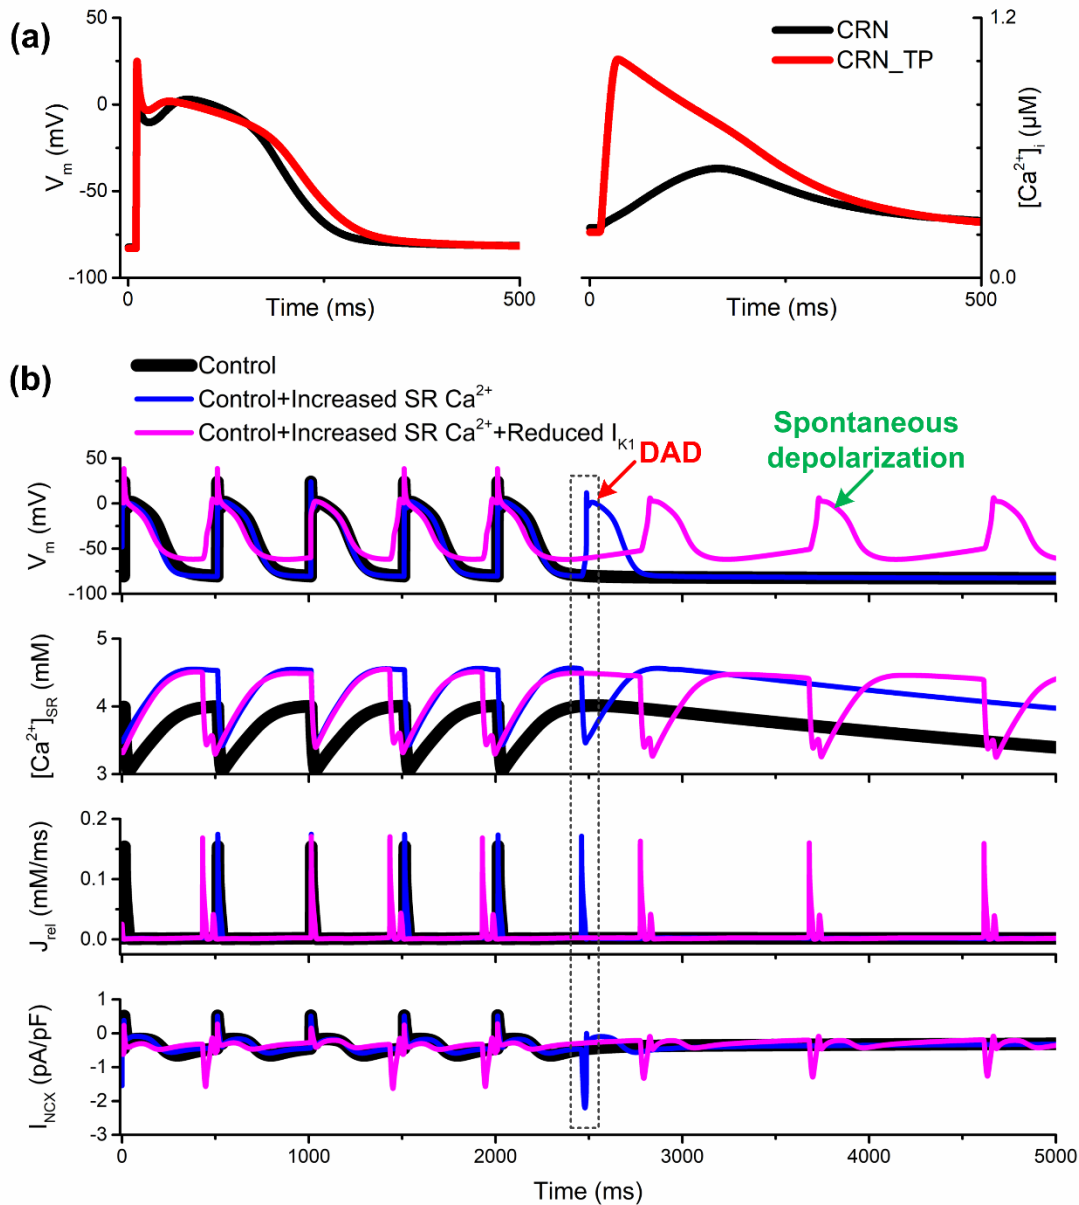

184

185 **Supplementary Figure S8.** Electrophysiological characteristics of the CRN\_TP model. (a) Action  
 186 potentials (left plane) and calcium transients (right plane) of the CRN (black) and CRN\_TP (red)  
 187 models. (b) Compared to the control condition, increased SR  $Ca^{2+}$  led to SR  $Ca^{2+}$  leak and delayed  
 188 afterdepolarization (DAD). Further reduced  $I_{K1}$  elevated resting membrane potential, favoring the  
 189 development of spontaneous diastolic depolarization.

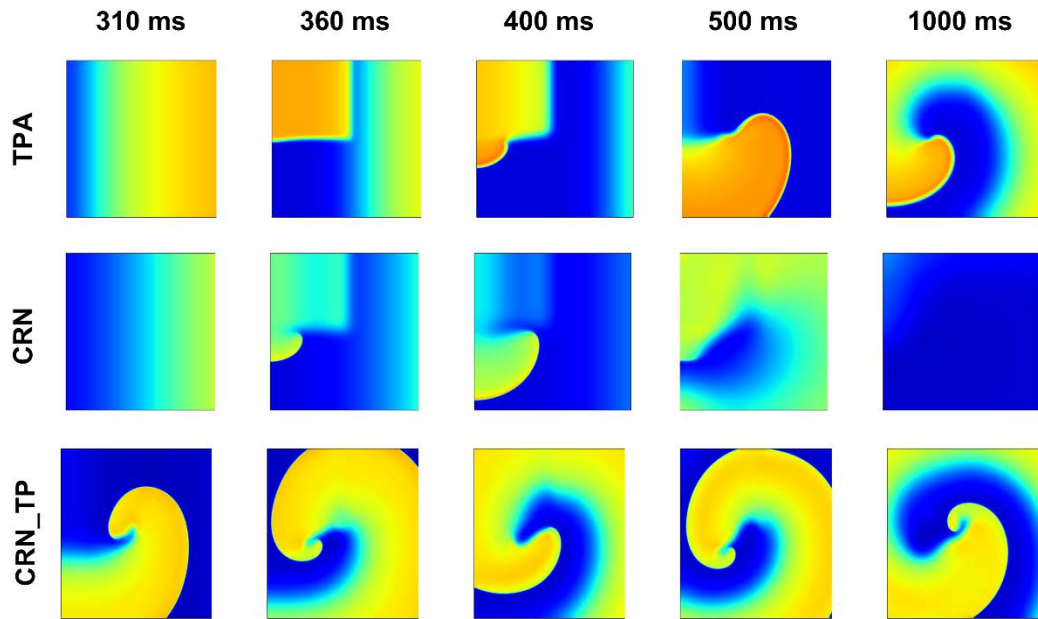

190

191 **Supplementary Figure S9. Snapshots of initiation and conduction of re-entry in a 2D tissue**  
 192 **using the TPA, CRN and CRN\_TP models.** Using our TPA and CRN\_TP models, the spiral  
 193 wave persisted. However, in the CRN model, the spiral wave self-terminated before  $t=1000\text{ms}$ .

194 **Initiation of re-entry in a 2D sheet:** Our two-dimensional (2D) simulation was carried out in an  
 195 isotropic domain with  $D=0.1 \text{ mm}^2/\text{ms}$ , a time step of  $0.0025 \text{ ms}$  and a space step of  $0.15 \text{ mm}$  in  
 196 both the  $x$  and  $y$  directions. These 2D simulations have been performed on a domain of  $500 \times 500$   
 197 grid points by using the explicit-Euler integration scheme. We have used Neumann no-flux  
 198 boundary conditions. Re-entry was initiated by a conventional S1-S2 cross-field protocol. As  
 199 shown in the **Supplementary Fig. S9**, stable spiral waves can be obtained using our TPA and  
 200 CRN\_TP models. In comparison, an unstable spiral wave was observed using the CRN model in  
 201 our simulations which is similar to what was observed in other studies<sup>19,20</sup>.

202 **Supplementary Video S1: Reentry in an idealized 2D geometry using the TPA model.** A re-  
 203 entrant spiral wave was generated by the application of a premature S2 stimulus after a delay of  
 204  $350 \text{ ms}$  from the initial wave stimulus. The induced spiral wave persisted.

205 **Supplementary Video S2: Reentry in an idealized 2D geometry using the CRN model.** A re-  
 206 entrant spiral wave was generated by the application of a premature S2 stimulus after a delay of  
 207  $320 \text{ ms}$  from the initial wave stimulus. The induced spiral wave self-terminated within  $750 \text{ ms}$ .

208 **Supplementary Video S3: Reentry in an idealized 2D geometry using the CRN\_TP model.** A  
209 re-entrant spiral wave was generated by the application of a premature S2 stimulus after a delay of  
210 190 ms from the initial wave. The induced spiral wave persisted.

## 211 References

- 212 1 Grandi, E. *et al.* Human Atrial Action Potential and Ca<sup>2+</sup> Model Sinus Rhythm and  
213 Chronic Atrial Fibrillation. *Circ.Res.* **109**, 1055-1066, doi:10.1161/circresaha.111.253955  
214 (2011).
- 215 2 Paci, M., Hyttinen, J., Aalto-Setälä, K. & Severi, S. Computational Models of Ventricular-  
216 and Atrial-Like Human Induced Pluripotent Stem Cell Derived Cardiomyocytes. *Ann*  
217 *Biomed Eng* **41**, 2334-2348, doi:10.1007/s10439-013-0833-3 (2013).
- 218 3 Amos, G. J. *et al.* Differences between outward currents of human atrial and subepicardial  
219 ventricular myocytes. *J Physiol* **491**, 31-50, doi:10.1113/jphysiol.1996.sp021194 (1996).
- 220 4 Wang, J. *et al.* Regional expression of sodium pump subunits isoforms and Na<sup>+</sup>-Ca<sup>++</sup>  
221 exchanger in the human heart. *J Clin Invest* **98**, 1650-1658, doi:10.1172/JCI118960 (1996).
- 222 5 Tusscher, K. H. W. J. t. & Panfilov, A. V. Alternans and spiral breakup in a human  
223 ventricular tissue model. *Am J Physiol Heart Circ Physiol* **291**, H1088-H1100,  
224 doi:10.1152/ajpheart.00109.2006 (2006).
- 225 6 Maleckar, M. M., Greenstein, J. L., Giles, W. R. & Trayanova, N. A. K<sup>+</sup> current changes  
226 account for the rate dependence of the action potential in the human atrial myocyte. *Am J*  
227 *Physiol Heart Circ Physiol* **297**, H1398-H1410, doi:10.1152/ajpheart.00411.2009 (2009).
- 228 7 Bai, J., Ren, Y., Wang, K. & Zhang, H. Mechanisms underlying the emergence of post-  
229 acidosis arrhythmia at the tissue level: A theoretical study. *Front Physiol* **8**, 195,  
230 doi:10.3389/fphys.2017.00195 (2017).
- 231 8 Bai, J. *et al.* Computational Cardiac Modeling Reveals Mechanisms of Ventricular  
232 Arrhythmogenesis in Long QT Syndrome Type 8: CACNA1C R858H Mutation Linked to  
233 Ventricular Fibrillation. *Front Physiol* **8**, 771, doi:10.3389/fphys.2017.00771 (2017).
- 234 9 Courtemanche, M., Ramirez, R. J. & Nattel, S. Ionic mechanisms underlying human atrial  
235 action potential properties: insights from a mathematical model. *Am J Physiol Heart Circ*  
236 *Physiol* **275**, H301-H321, doi:10.1152/ajpheart.1998.275.1.H301 (1998).
- 237 10 Aguilar, M., Feng, J., Vigmond, E., Comtois, P. & Nattel, S. Rate-dependent role of I<sub>Kur</sub>  
238 in human atrial repolarization and atrial fibrillation maintenance. *Biophys J* **112**, 1997-  
239 2010, doi:10.1016/j.bpj.2017.03.022 (2017).
- 240 11 Nadadur, R. D. *et al.* Pitx2 modulates a Tbx5-dependent gene regulatory network to  
241 maintain atrial rhythm. *Sci Transl Med* **8**, 354ra115, doi:10.1126/scitranslmed.aaf4891  
242 (2016).



- 243 12 Tao, Y. *et al.* Pitx2, an Atrial Fibrillation Predisposition Gene, Directly Regulates Ion  
244 Transport and Intercalated Disc Genes. *Circ Cardiovasc Genet* **7**, 23-32,  
245 doi:10.1161/circgenetics.113.000259 (2014).
- 246 13 Pérez-Hernández, M. *et al.* Pitx2c increases in atrial myocytes from chronic atrial  
247 fibrillation patients enhancing IKs and decreasing ICa,L. *Cardiovasc Res* **109**, 431-441,  
248 doi:10.1093/cvr/cvv280 (2016).
- 249 14 Lozano-Velasco, E. *et al.* Pitx2 impairs calcium handling in a dose-dependent manner by  
250 modulating Wnt signalling. *Cardiovasc Res* **109**, 55-66, doi:10.1093/cvr/cvv207 (2016).
- 251 15 Chinchilla, A. *et al.* PITX2 insufficiency leads to atrial electrical and structural remodeling  
252 linked to arrhythmogenesis. *Circ Genom Precis Med* **4**, 269-279,  
253 doi:10.1161/CIRCGENETICS.110.958116 (2011).
- 254 16 Lozano-Velasco, E. *et al.* Hyperthyroidism, but not hypertension, impairs PITX2  
255 expression leading to Wnt-microRNA-ion channel remodeling. *PLoS One* **12**, e0188473,  
256 doi:10.1371/journal.pone.0188473 (2017).
- 257 17 Kirchhof, P. *et al.* PITX2c is expressed in the adult left atrium, and reducing Pitx2c  
258 expression promotes atrial fibrillation inducibility and complex changes in gene  
259 expression. *Circ Genom Precis Med* **4**, 123-133, doi:10.1161/Circgenetics.110.958058  
260 (2011).
- 261 18 Voigt, N. *et al.* Cellular and molecular mechanisms of atrial arrhythmogenesis in patients  
262 with paroxysmal atrial fibrillation. *Circulation* **129**, 145-146,  
263 doi:10.1161/CIRCULATIONAHA.113.006641 (2013).
- 264 19 Cherry, E. M. & Evans, S. J. Properties of two human atrial cell models in tissue:  
265 restitution, memory, propagation, and reentry. *J Theor Biol* **254**, 674-690,  
266 doi:10.1016/j.jtbi.2008.06.030 (2008).
- 267 20 Wilhelms, M. *et al.* Benchmarking electrophysiological models of human atrial myocytes.  
268 *Front Physiol* **3**, 16, doi:10.3389/fphys.2012.00487 (2013).

269

```
//TPA.cpp
// Based on code by Jieyun Bai, Patrick A. Gladding, Martin K. Stiles, Vadim V. Fedorov,
Jichao Zhao
// Jieyun Bai v1.1 6 June 2018 jieyun.bai@auckland.ac.nz

// For more information
// see the inventors' web page at
// https://unidirectory.auckland.ac.nz/people/j-zhao

// Reference
// Ionic and cellular mechanisms underlying TBX5/PITX2 insufficiency-induced atrial
fibrillation: Insights from mathematical models of human atrial cells
// Jieyun Bai, Patrick A. Gladding, Martin K. Stiles, Vadim V. Fedorov &Jichao Zhao
// Scientific Reports. 2018.

// This code is based on an earlier implementation of a similar model described in:
// Bai, J. et al. Computational Cardiac Modeling Reveals Mechanisms of Ventricular
Arrhythmogenesis in Long QT Syndrome Type 8: CACNA1C R858H Mutation Linked to Ventricular
Fibrillation. Front Physiol. 8, 771.
// Bai, J., Ren, Y., Wang, K. & Zhang, H. Mechanisms underlying the emergence of
post-acidosis arrhythmia at the tissue level: A theoretical study. Front Physiol. 8, 195.
// Tusscher, K. H. W. J. t. and A. V. Panfilov (2006). "Alternans and spiral breakup in a
human ventricular tissue model." Am J Physiol Heart Circ Physiol. 291(3): H1088-H1100.

// Copyright (C) 2018, jieyun Bai
// All rights reserved.

// Redistribution and use in source and binary forms, with or without
// modification, are permitted provided that the following conditions
// are met:
//
// 1. Redistributions of source code must retain the above copyright
// notice, this list of conditions and the following disclaimer.
//
// 2. Redistributions in binary form must reproduce the above copyright
// notice, this list of conditions and the following disclaimer in the
// documentation and/or other materials provided with the distribution.
//
// 3. The names of its contributors may not be used to endorse or promote
// products derived from this software without specific prior written
// permission.
//
// THIS SOFTWARE IS PROVIDED BY THE COPYRIGHT HOLDERS AND CONTRIBUTORS "AS IS"
// AND ANY EXPRESS OR IMPLIED WARRANTIES, INCLUDING, BUT NOT LIMITED TO, THE
// IMPLIED WARRANTIES OF MERCHANTABILITY AND FITNESS FOR A PARTICULAR PURPOSE
// ARE DISCLAIMED. IN NO EVENT SHALL THE COPYRIGHT OWNER OR CONTRIBUTORS BE
// LIABLE FOR ANY DIRECT, INDIRECT, INCIDENTAL, SPECIAL, EXEMPLARY, OR
// CONSEQUENTIAL DAMAGES (INCLUDING, BUT NOT LIMITED TO, PROCUREMENT OF
// SUBSTITUTE GOODS OR SERVICES; LOSS OF USE, DATA, OR PROFITS; OR BUSINESS
// INTERRUPTION) HOWEVER CAUSED AND ON ANY THEORY OF LIABILITY, WHETHER IN
// CONTRACT, STRICT LIABILITY, OR TORT (INCLUDING NEGLIGENCE OR OTHERWISE)
// ARISING IN ANY WAY OUT OF THE USE OF THIS SOFTWARE, EVEN IF ADVISED OF THE
// POSSIBILITY OF SUCH DAMAGE.

// The original code included the following notice:
//
// When you use this, send an email to: jieyun.bai@auckland.ac.nz
// with an appropriate reference to your work.
//
// It would be nice to CC: j.zhao@auckland.ac.nz
// when you write.

// 06/06/18 added IKur equations for Ikur as in Maleckar et al. 2009
// 06/06/18 Changed IK1=*0.2
// 06/06/18 Changed Ito=*2
// 06/06/18 Changed IKs=*2
// 06/06/18 Changed IKr=*1.3
// 06/06/18 Changed INaK=0.7*
```

```
// 06/06/18 Changed INCX
// 06/06/18 Changed Jup
// 06/06/18 Changed Jrel
// 06/06/18 Changed IcaL=1.5*
```

```
#include <stdio.h>
#include <stdlib.h>
#include <math.h>

#define Begin          0
#define S1             1000
#define S2             1000
#define stim_strength  -80
#define stim_period    0.5
#define s1_beats       30
#define s2_beats       10
#define TRUE           1
#define FALSE          0

#define HT             0.02
#define HX             0.2

#define WIDTH          1
#define LENGTH         (N_EPI+N_MCELL+N_ENDO+1)
#define N_EPI          40
#define N_MCELL         35
#define N_ENDO          25

#define ENDO            1
#define MCELL           2
#define EPI             3

#define HT              0.02

#define DDVMT           0.154
#define DDVML           0.154

#define F               96486.3415
#define T               310.0
#define R               8314.472

#define Vc              0.016404
#define Vsr             0.001094
#define Vss             0.00005468

#define inverseVcF2     (1./ (2*Vc*F))
#define inverseVcF      (1./ (Vc*F))
#define inversevssF2   (1./ (2*Vss*F))
#define RTONF           (R*T/F)
#define CAPACITANCE    0.185

#define PARAMETERS      25
#define M               0
#define H               1
#define J               2
#define Xr1             3
#define Xr2             4
#define Xs              5
#define S               6
#define R2              7
#define D               8
#define F1              9
#define F2             10
#define FCass          11
#define RR             12
#define OO             13
#define Volt           14
#define Volt2          15
#define cai            16
#define caSR           17
```

```

#define caSS 18
#define nai 19
#define ki 20
#define ssItot 21
#define sxkur 22
#define sykur 23
#define sskur 24

#define sm paraVM[x][y][M]
#define sh paraVM[x][y][H]
#define sj paraVM[x][y][J]
#define sxr1 paraVM[x][y][Xr1]
#define sxr2 paraVM[x][y][Xr2]
#define sxs paraVM[x][y][Xs]
#define ss paraVM[x][y][S]
#define sr paraVM[x][y][R2]
#define sd paraVM[x][y][D]
#define sf paraVM[x][y][F1]
#define sf2 paraVM[x][y][F2]
#define sfcass paraVM[x][y][FCass]
#define sRR paraVM[x][y][RR]
#define sOO paraVM[x][y][OO]
#define svolt paraVM[x][y][Volt]
#define svolt2 paraVM[x][y][Volt2]
#define Cai paraVM[x][y][cai]
#define CaSR paraVM[x][y][caSR]
#define CaSS paraVM[x][y][caSS]
#define Nai paraVM[x][y][nai]
#define Ki paraVM[x][y][ki]
#define sItot paraVM[x][y][ssItot]
#define xkur paraVM[x][y][sxkur] //Atrial
#define ykur paraVM[x][y][sykur] //Atrial
#define skur paraVM[x][y][sskur] //Atrial

```

```

const double Ko=5.4;
const double Cao=2.0;
const double Nao=140.0;

```

```

double paraVM[WIDTH][LENGTH][PARAMETERS];
double time=0;
int filecounter=0;
int origin[WIDTH][LENGTH];

```

```

double IKr=0;
double IKs=0;
double IK1=0;
double Ito=0;
double INa=0;
double IbNa=0;
double ICaL=0;
double ICaL_V=0;//1111111111111111 jieyun
double IbCa=0;
double INaCa=0;
double IpCa=0;
double IpK=0;
double INaK=0;
double Irel=0;
double Ileak=0;//1111111111111111 jieyun
double Irelease=0;
double Iup=0;
double Ixfer=0;
double I_kur=0;// Atrial

```

```

int init()
{
    int x,y;
    for (x = 0; x < WIDTH; x++)

```

```

{
    for (y = 0; y<LENGTH; y++)
    {
        paraVM[x][y][Volt]==-86.2;
        paraVM[x][y][Volt2]==-86.2;
        paraVM[x][y][cai] = 0.00007;
        paraVM[x][y][caSR] = 1.3;
        paraVM[x][y][caSS] = 0.00007;
        paraVM[x][y][nai] = 7.67;
        paraVM[x][y][ki] = 138.3;
        paraVM[x][y][M] = 0.0;
        paraVM[x][y][H] = 0.75;
        paraVM[x][y][J] = 0.75;
        paraVM[x][y][Xr1] = 0.0;
        paraVM[x][y][Xr2] = 1.0;
        paraVM[x][y][Xs] = 0.0;
        paraVM[x][y][R2] = 0.0;
        paraVM[x][y][S] = 1.0;
        paraVM[x][y][D] = 0.0;
        paraVM[x][y][F1] = 1.0;
        paraVM[x][y][F2] = 1.0;
        paraVM[x][y][FCass] = 1.0;
        paraVM[x][y][RR] = 1.0;
        paraVM[x][y][OO] = 0.0;
        paraVM[x][y][sxkur] = 3.824458e-04; //Atrial
        paraVM[x][y][sykur] = 9.597222e-01; //Atrial
        paraVM[x][y][sskur] = 9.597222e-01; //Atrial
    }
}

return 1;
}

double getVMItot(int x, int y, double dt, double Istim, int celltype)
{
    //Calcium buffering dynamics
    double Bufc=0.2;
    double Kbufc=0.001;
    double Bufsr=10.;
    double Kbufsr=0.3;
    double Bufss=0.4;
    double Kbufss=0.00025;

    //Intracellular calcium flux dynamics
    double Vmaxup=0.006375;
    double Kup=0.00025*2;//Atrial
    double Vrel=0.102;

    double k1_ =0.15;
    double k2_ =0.045;
    double k3=0.060;
    double k4=0.005;
    double EC=1.5;
    double maxsr=2.5;
    double minsr=1.;
    double Vleak=0.00036;
    double Vxfer=0.0038;

    double Gkr=0.153*1.3; //Atrial
    double pKNa=0.03;
    double GK1=5.405*0.2; //Atrial
    double GNa=14.838;
    double GbNa=0.00029;
    double KmK=1.0;
    double KmNa=40.0;
    double knak=2.724*0.7;//Atrial

```

```
double GCaI=0.00003980*1.5;//Atrial
double GbCa=0.000592;
double knaca=1000*0.7;//Atrial
double KmNai=87.5;
double KmCa=1.38;
double ksar=0.1*0.8;//Atrial
double nn=0.35;
double GpCa=0.1238;
double KpCa=0.0005;
double GpK=0.0146;

double k1=0;
double k2=0;
double kCaSR=0;

double dNai=0;
double dKi=0;
double dCai=0;
double dCaSR=0;
double dCaSS=0;
double dRR=0;

double Ek=0;
double Ena=0;
double Eks=0;
double Eca=0;
double CaCSQN=0;
double bjsr=0;
double cjsr=0;
double CaSSBuf=0;
double CaBuf=0;
double bc=0;
double cc=0;
double Ak1=0;
double Bk1=0;
double rec_iK1=0;
double rec_ipK=0;
double rec_iNaK=0;
double AM=0;
double BM=0;
double AH_1=0;
double BH_1=0;
double AH_2=0;
double BH_2=0;
double AJ_1=0;
double BJ_1=0;
double AJ_2=0;
double BJ_2=0;
double M_INF=0;
double H_INF=0;
double J_INF=0;
double TAU_M=0;
double TAU_H=0;
double TAU_J=0;
double axr1=0;
double bxr1=0;
double axr2=0;
double bxr2=0;
double Xr1_INF=0;
double Xr2_INF=0;
double TAU_Xr1=0;
double TAU_Xr2=0;
double Axs=0;
double Bxs=0;
double Xs_INF=0;
double TAU_Xs=0;
double R_INF=0;
double TAU_R=0;
double S_INF=0;
double TAU_S=0;
double Ad=0;
```

```

double Bd=0;
double Cd=0;

double Af;
double Bf;
double Cf;
double Af2;
double Bf2;
double Cf2;
double bcss;
double ccss;

double TAU_D=0;
double D_INF=0;
double TAU_F=0;
double F_INF=0;

double TAU_F2;
double F2_INF;
double TAU_FCaSS;
double FCaSS_INF;

double xkur_INF;// Atrial
double TAU_xkur;// Atrial
double ykur_INF;// Atrial
double TAU_ykur;// Atrial
double GIkur; // Atrial

double Gks, Gto;
Gks=0.392*2; // Atrial
Gto=0.294*2; // Atrial

Ek=RTONF*(log((Ko/Ki)));
Ena=RTONF*(log((Nao/Nai)));
Eks=RTONF*(log((Ko+pKNa*Nao)/(Ki+pKNa*Nai)));
Eca=0.5*RTONF*(log((Cao/Cai)));

Ak1=0.1/(1.+exp(0.06*(svolt-Ek-200)));
Bk1=(3.*exp(0.0002*(svolt-Ek+100))+exp(0.1*(svolt-Ek-10)))/(1.+exp(-0.5*(svolt-Ek)));
rec_iK1=Ak1/(Ak1+Bk1);

rec_iNaK=(1./(1.+0.1245*exp(-0.1*svolt*F/(R*T))+0.0353*exp(-svolt*F/(R*T))));
rec_ipK=1./(1.+exp((25-svolt)/5.98));

// I_kur: Ultra rapid delayed rectifier Outward K Current
GIkur =0.045; //Atrial
I_kur = GIkur*xkur*ykur*(svolt-Ek); //Atrial

INa=GNa*sm*sm*sm*sh*sj*(svolt-Ena);

ICaL=GCaL*sd*sf*sf2*sfcass*4*(svolt-15)*(F*F/(R*T))*(0.25*exp(2*(svolt-15)*F/(R*T))*CaSS-Cao)/(exp(2*(svolt-15)*F/(R*T))-1.);
Ito=Gto*sr*ss*(svolt-Ek);
IKr=Gkr*sqrt(Ko/5.4)*sxr1*sxr2*(svolt-Ek);
IKs=Gks*sxs*sxs*(svolt-Eks);
IK1=GK1*rec_iK1*(svolt-Ek);

INaCa=knaca*(1./(KmNai*KmNai*KmNai+Nao*Nao*Nao))*(1./(KmCa+Cao))*(1./(1+ksat*exp((nn-1)*svolt*F/(R*T))))*(exp(nn*svolt*F/(R*T))*Nai*Nai*Nai*Cao-exp((nn-1)*svolt*F/(R*T))*Nao*Nao*Nao*Cai*2.5);
INaK=knak*(Ko/(Ko+KmK))*(Nai/(Nai+KmNa))*rec_iNaK;
IpCa=GpCa*Cai/(KpCa+Cai);
IpK=GpK*rec_ipK*(svolt-Ek);
IbNa=GbNa*(svolt-Ena);
IbCa=GbCa*(svolt-Eca);

(sItot) = IKr +IKs +IK1 +Ito +INa +IbNa +ICaL +IbCa +INaK +INaCa +IpCa
+IpK + I_kur +Istim;// Atrial

kCaSR=maxsr-((maxsr-minsr)/(1+(EC/CaSR)*(EC/CaSR)));

```

```

k1=k1_/kCaSR;
k2=k2_*kCaSR;
dRR=k4*(1-sRR)-k2*CaSS*sRR;
sRR+=HT*dRR;
sOO=k1*CaSS*CaSS*sRR/(k3+k1*CaSS*CaSS);

Irel=Vrel*sOO*(CaSR-CaSS)+Vleak*sRR*(CaSR-CaSS); // Atrial
Iup=Vmaxup/(1.+(Kup*Kup)/(Cai*Cai));
Ixfer=Vxfer*(CaSS-Cai);

CaCSQN=Bufsr*CaSR/(CaSR+Kbufsr);
dCaSR=HT*(Iup-Irel); //Atrial
bjsr=Bufsr-CaCSQN-dCaSR-CaSR+Kbufsr;
cjsr=Kbufsr*(CaCSQN+dCaSR+CaSR);
CaSR=(sqrt(bjsr*bjsr+4*cjsr)-bjsr)/2;

CaSSBuf=Bufss*CaSS/(CaSS+Kbufss);
dCaSS=HT*(-Ixfer*(Vc/Vss)+Irel*(Vsr/Vss)+(-ICaL*inversevssF2*CAPACITANCE));
bcss=Bufss-CaSSBuf-dCaSS-CaSS+Kbufss;
ccss=Kbufss*(CaSSBuf+dCaSS+CaSS);
CaSS=(sqrt(bcss*bcss+4*ccss)-bcss)/2;

CaBuf=Bufc*Cai/(Cai+Kbufc); //Atrial
dCai=HT*((- (IbCa+IpCa-2*INaCa)*inverseVcF2*CAPACITANCE)-(Iup)*(Vsr/Vc)+Ixfer); //Atrial
bc=Bufc-CaBuf-dCai-Cai+Kbufc;
cc=Kbufc*(CaBuf+dCai+Cai);
Cai=(sqrt(bc*bc+4*cc)-bc)/2;

dNai=- (INa+IbNa+3*INaK+3*INaCa)*inverseVcF*CAPACITANCE;
Nai+=HT*dNai;

dKi=- (Istim+IK1+Ito+IKr+I_kur+IKs-2*INaK+IpK)*inverseVcF*CAPACITANCE; //Atrial
Ki+=HT*dKi;

AM=1./(1.+exp((-60.-svolt)/5.));
BM=0.1/(1.+exp((svolt+35.)/5.))+0.10/(1.+exp((svolt-50.)/200.));
TAU_M=AM*BM;
M_INF=1./((1.+exp((-56.86-svolt)/9.03))*(1.+exp((-56.86-svolt)/9.03)));
if (svolt>=-40.)
{
    AH_1=0.;
    BH_1=(0.77/(0.13*(1.+exp(-(svolt+10.66)/11.1))));
    TAU_H= 1.0/(AH_1+BH_1);
}
else
{
    AH_2=(0.057*exp(-(svolt+80.)/6.8));
    BH_2=(2.7*exp(0.079*svolt)+(3.1e5)*exp(0.3485*svolt));
    TAU_H=1.0/(AH_2+BH_2);
}
H_INF=1./((1.+exp((svolt+71.55)/7.43))*(1.+exp((svolt+71.55)/7.43)));

if (svolt>=-40.)
{
    AJ_1=0.;
    BJ_1=(0.6*exp((0.057)*svolt)/(1.+exp(-0.1*(svolt+32.))));
    TAU_J= 1.0/(AJ_1+BJ_1);
}
else
{
    AJ_2=((-2.5428e4)*exp(0.2444*svolt)-(6.948e-6)*exp(-0.04391*svolt))*(svolt+37.78)/(1.+exp(0.311*(svolt+79.23)));
    BJ_2=(0.02424*exp(-0.01052*svolt)/(1.+exp(-0.1378*(svolt+40.14))));
    TAU_J= 1.0/(AJ_2+BJ_2);
}
J_INF=H_INF;

Xr1_INF=1./(1.+exp((-26.-svolt)/7.));
axr1=450./(1.+exp((-45.-svolt)/10.));
bxr1=6./(1.+exp((svolt-(-30.))/11.5));

```



```

TAU_Xr1=axr1*bxr1;
Xr2_INF=1./(1.+exp((svolt-(-88.))/24.));
axr2=3./(1.+exp((-60.-svolt)/20.));
bxr2=1.12/(1.+exp((svolt-60.)/20.));
TAU_Xr2=axr2*bxr2;

Xs_INF=1./(1.+exp((-5.-svolt)/14.));
Axs=(1400./(sqrt(1.+exp((5.-svolt)/6)))));
Bxs=(1./(1.+exp((svolt-35.)/15.)));
TAU_Xs=Axs*Bxs+80;

R_INF=1./(1.+exp((20-svolt)/6.));
S_INF=1./(1.+exp((svolt+20)/5.));
TAU_R=9.5*exp(-(svolt+40.)*(svolt+40.)/1800.)+0.8;
TAU_S=85.*exp(-(svolt+45.)*(svolt+45.)/320.)+5./(1.+exp((svolt-20.)/5.))+3.;

D_INF=1./(1.+exp((-8-svolt)/7.5));
Ad=1.4/(1.+exp((-35-svolt)/13))+0.25;
Bd=1.4/(1.+exp((svolt+5)/5));
Cd=1./(1.+exp((50-svolt)/20));
TAU_D=(Ad*Bd+Cd);

F_INF=1./(1.+exp((svolt+20)/7));

Af=1102.5*exp(-(svolt+27)*(svolt+27)/225);
Bf=200./(1+exp((13-svolt)/10.));
Cf=(180./(1+exp((svolt+30)/10)))+20;
TAU_F=(Af+Bf+Cf);
F2_INF=0.67/(1.+exp((svolt+35)/7))+0.33;
Af2=600*exp(-(svolt+25)*(svolt+25)/170);
Bf2=31/(1.+exp((25-svolt)/10));
Cf2=16/(1.+exp((svolt+30)/10));
TAU_F2=(Af2+Bf2+Cf2);
FCaSS_INF=0.6/(1+(CaSS/0.05)*(CaSS/0.05))+0.4;
TAU_FCaSS=(80./(1+(CaSS/0.05)*(CaSS/0.05))+2.);

xkur_INF=1./(1.+exp((svolt+6.)/-8.6)); //Atrial
TAU_xkur=9./(1.+exp((svolt+5.)/12.0))+0.5; //Atrial
ykur_INF=1./(1.+exp((svolt+7.5)/10.)); //Atrial
TAU_ykur=(590./(1.+exp((svolt+60.)/10.0))+3050.); //Atrial

sm = M_INF-(M_INF-sm)*exp(-HT/TAU_M); //1111111111111111
sh = H_INF-(H_INF-sh)*exp(-HT/TAU_H); //1111111111111111
sj = J_INF-(J_INF-sj)*exp(-HT/TAU_J); //1111111111111111
sxr1 = Xr1_INF-(Xr1_INF-sxr1)*exp(-HT/TAU_Xr1); //1111111111111111
sxr2 = Xr2_INF-(Xr2_INF-sxr2)*exp(-HT/TAU_Xr2); //1111111111111111
sxs = Xs_INF-(Xs_INF-sxs)*exp(-HT/TAU_Xs); //1111111111111111
ss= S_INF-(S_INF-ss)*exp(-HT/TAU_S); //1111111111111111
sr= R_INF-(R_INF-sr)*exp(-HT/TAU_R); //1111111111111111
sd = D_INF-(D_INF-sd)*exp(-HT/TAU_D); //1111111111111111
sf =F_INF-(F_INF-sf)*exp(-HT/TAU_F); //1111111111111111
sf2 =F2_INF-(F2_INF-sf2)*exp(-HT/TAU_F2); //1111111111111111
sfcass =FCaSS_INF-(FCaSS_INF-sfcass)*exp(-HT/TAU_FCaSS); //1111111111111111
xkur = xkur_INF-(xkur_INF-xkur)*exp(-dt/TAU_xkur); //Atrial
ykur = ykur_INF-(ykur_INF-ykur)*exp(-dt/TAU_ykur); //Atrial
skur = 0;

return (sItot);
}

void Current_Contentions () {
int celltype=EPI;
int x=0,y=0;
double time = 0;
double tbegin = 0;
double tend = 600;

```

```

double stimtime=100;
double Istim = 0;
double dt = 0.02;
double loadtime=600;
int k = 0;
int r = 0;
int i = 0;
int ii = 0;
double t = 0;

init();

FILE * ap1,* ap2,* ap3,* ap4,* ap5,* ap6,* ap7,* ap8,* ap9,* ap10,* ap11,* ap12,* ap13,*
ap14,* ap15,* ap16,* ap17,* ap18,* ap19,* ap20,* ap21,* ap22,* ap23,* ap24,* ap25,*
ap26,* ap27,* ap28,* ap29,* ap30,* ap31,* ap32,* ap33,* ap34,* ap35;
char * str1,* str2,* str3,* str4,* str5,* str6,* str7,* str8,* str9,* str10,* str11,*
str12,* str13,* str14,* str15,* str16,* str17,* str18,* str19,* str20,* str21,* str22,*
str23,* str24,* str25,* str26,* str27,* str28,* str29,* str30,* str31,* str32,* str33,*
str34,* str35;

str1 = (char*)malloc(32*sizeof(char));
if (str1 == NULL){
    printf("\n out of memory ");
    exit(1);
}
sprintf(str1,"AP_%d.txt",celltype);
printf("\n open the %s file", str1);
ap1=fopen(str1,"w");
if (ap1 == NULL){
    printf("\n cannot open file ");
    exit(1);
}

str2 =(char *) malloc(32*sizeof(char));
if (str2 == NULL){
    printf("\n out of memory ");
    exit(1);
}
sprintf(str2," INa_%d.txt",celltype);
ap2 = fopen(str2,"w");
if (ap2 == NULL)
{
    printf("\n cannot open file ");
    exit(1);
}
//free(str2);

str4 =(char *) malloc(32*sizeof(char));
if (str4 == NULL){
    printf("\n out of memory ");
    exit(1);
}
sprintf(str4," Ito_%d.txt",celltype);

ap4 = fopen(str4,"w");
if (ap4 == NULL)
{
    printf("\n cannot open file ");
    exit(1);
}
//free(str4);

str5 =(char *) malloc(32*sizeof(char));
if (str5 == NULL){
    printf("\n out of memory ");
    exit(1);
}
sprintf(str5," ICaL_%d.txt",celltype);

ap5 = fopen(str5,"w");

```

```
if (ap5 == NULL)
{
    printf("\n cannot open file ");
    exit(1);
}
//free(str5);

str6 =(char *) malloc(32*sizeof(char));
if (str6 == NULL){
    printf("\n out of memory ");
    exit(1);
}
sprintf(str6," OO_%d.txt",celltype);

ap6 = fopen(str6,"w");
if (ap6 == NULL)
{
    printf("\n cannot open file ");
    exit(1);
}
//free(str6);

str7 =(char *) malloc(32*sizeof(char));
if (str7 == NULL){
    printf("\n out of memory ");
    exit(1);
}
sprintf(str7," RR_%d.txt",celltype);

ap7 = fopen(str7,"w");
if (ap7 == NULL)
{
    printf("\n cannot open file ");
    exit(1);
}
//free(str7);

str8 =(char *) malloc(32*sizeof(char));
if (str8 == NULL){
    printf("\n out of memory ");
    exit(1);
}
sprintf(str8," Jrel_%d.txt",celltype);

ap8 = fopen(str8,"w");
if (ap8 == NULL)
{
    printf("\n cannot open file ");
    exit(1);
}
//free(str8);

str9 =(char *) malloc(32*sizeof(char));
if (str9 == NULL){
    printf("\n out of memory ");
    exit(1);
}
sprintf(str9," Jup_%d.txt",celltype);

ap9 = fopen(str9,"w");
if (ap9 == NULL)
{
    printf("\n cannot open file ");
    exit(1);
}
//free(str9);

str10 =(char *) malloc(32*sizeof(char));
if (str10 == NULL){
    printf("\n out of memory ");
```

```
    exit(1);
}
sprintf(str10," IKr_%d.txt",celltype);

ap10 = fopen(str10,"w");
if (ap10 == NULL)
{
    printf("\n cannot open  file ");
    exit(1);
}
//free(str10);

str11 =(char *) malloc(32*sizeof(char));
if (str11 == NULL){
    printf("\n out of memory ");
    exit(1);
}
sprintf(str11," IKs_%d.txt",celltype);

ap11= fopen(str11,"w");
if (ap11 == NULL)
{
    printf("\n cannot open  file ");
    exit(1);
}
//free(str11);

str12 =(char *) malloc(32*sizeof(char));
if (str12 == NULL){
    printf("\n out of memory ");
    exit(1);
}
sprintf(str12," IKl_%d.txt",celltype);

ap12= fopen(str12,"w");
if (ap12 == NULL)
{
    printf("\n cannot open  file ");
    exit(1);
}
//free(str12);

str13 =(char *) malloc(32*sizeof(char));
if (str13 == NULL){
    printf("\n out of memory ");
    exit(1);
}
sprintf(str13," INaCa_%d.txt",celltype);

ap13= fopen(str13,"w");
if (ap13 == NULL)
{
    printf("\n cannot open  file ");
    exit(1);
}
//free(str13);

str14=(char *) malloc(32*sizeof(char));
if (str14 == NULL){
    printf("\n out of memory ");
    exit(1);
}
sprintf(str14," INaK_%d.txt",celltype);

ap14 = fopen(str14,"w");
if (ap14 == NULL)
{
```

```
    printf("\n cannot open  file ");
    exit(1);
}
//free(str14);

str15 =(char *) malloc(32*sizeof(char));
if (str15 == NULL){
    printf("\n out of memory ");
    exit(1);
}
sprintf(str15," IKb_%d.txt",celltype);

ap15 = fopen(str15,"w");
if (ap15 == NULL)
{
    printf("\n cannot open  file ");
    exit(1);
}
//free(str15);

str16 =(char *) malloc(32*sizeof(char));
if (str16 == NULL){
    printf("\n out of memory ");
    exit(1);
}
sprintf(str16," INab_%d.txt",celltype);

ap16 = fopen(str16,"w");
if (ap16 == NULL)
{
    printf("\n cannot open  file ");
    exit(1);
}
//free(str16);

str17 =(char *) malloc(32*sizeof(char));
if (str17 == NULL){
    printf("\n out of memory ");
    exit(1);
}
sprintf(str17," ICab_%d.txt",celltype);

ap17 = fopen(str17,"w");
if (ap17 == NULL)
{
    printf("\n cannot open  file ");
    exit(1);
}
//free(str17);

str18 =(char *) malloc(32*sizeof(char));
if (str18 == NULL){
    printf("\n out of memory ");
    exit(1);
}
sprintf(str18," IpCa_%d.txt",celltype);

ap18 = fopen(str18,"w");
if (ap18 == NULL)
{
    printf("\n cannot open  file ");
    exit(1);
}
//free(str18);

str19 =(char *) malloc(32*sizeof(char));
if (str19 == NULL){
```

```
    printf("\n out of memory ");
    exit(1);
}
sprintf(str19," Nai_%d.txt",celltype);

ap19 = fopen(str19,"w");
if (ap19 == NULL)
{
    printf("\n cannot open  file ");
    exit(1);
}
//free(str19);

str20 =(char *) malloc(32*sizeof(char));
if (str20 == NULL){
    printf("\n out of memory ");
    exit(1);
}
sprintf(str20," I_kur_%d.txt",celltype);

ap20 = fopen(str20,"w");
if (ap20 == NULL)
{
    printf("\n cannot open  file ");
    exit(1);
}
//free(str20);

str21 =(char *) malloc(32*sizeof(char));
if (str21 == NULL){
    printf("\n out of memory ");
    exit(1);
}
sprintf(str21," Ki_%d.txt",celltype);

ap21= fopen(str21,"w");
if (ap21 == NULL)
{
    printf("\n cannot open  file ");
    exit(1);
}
//free(str21);

str23 =(char *) malloc(32*sizeof(char));
if (str23 == NULL){
    printf("\n out of memory ");
    exit(1);
}
sprintf(str23," Cai_%d.txt",celltype);

ap23= fopen(str23,"w");
if (ap23 == NULL)
{
    printf("\n cannot open  file ");
    exit(1);
}
//free(str23);

str24=(char *) malloc(32*sizeof(char));
if (str24 == NULL){
    printf("\n out of memory ");
    exit(1);
}
sprintf(str24," Cass_%d.txt",celltype);

ap24 = fopen(str24,"w");
if (ap24 == NULL)
{
```

```

    printf("\n cannot open file ");
    exit(1);
}
//free(str24);

str25 =(char *) malloc(32*sizeof(char));
if (str25 == NULL){
    printf("\n out of memory ");
    exit(1);
}
sprintf(str25," Casr_%d.txt",celltype);

ap25 = fopen(str25,"w");
if (ap25 == NULL)
{
    printf("\n cannot open file ");
    exit(1);
}
//free(str25);

str32 =(char *) malloc(32*sizeof(char));
if (str32 == NULL){
    printf("\n out of memory ");
    exit(1);
}
sprintf(str32," Ixfer_%d.txt",celltype);

ap32= fopen(str32,"w");
if (ap32 == NULL)
{
    printf("\n cannot open file ");
    exit(1);
}
//free(str32);

tbegin = Begin;
time = 0;

for (i = 1; i<=s1_beats; i++){
    if(i<50)
        tend = tbegin + S1;
    else
        tend = tbegin + S2;
    printf("\n S1.%d - @: %f ms ", i, tend);
    while ( (tend-time) > dt*0.5 ){
        if((time>tbegin&&time<=(tbegin+stim_period)&&i<(s1_beats-5))){
            Istim= stim_strength;
            printf ("start at: %f \n", time);
        }
        else
            Istim=0.0;

        stimtime = stimtime+dt;

        svolt = svolt - dt * getVMItot(x, y, dt, Istim,celltype);

        time+=dt;

        if(time>=0&&time>(S1*(s1_beats-7)-10)&&time<((S1*(s1_beats-7)-10)+3000)){
            if (10 == k){
                k=0;
                fprintf(ap1,"%f %f ",time-S1*(s1_beats-7),svolt);
                fprintf(ap1," \n");
                fprintf(ap2,"%f %f ",time-S1*(s1_beats-7),INa);
                fprintf(ap2," \n");
                fprintf(ap4,"%f %f ",time-S1*(s1_beats-7),Ito);
                fprintf(ap4," \n");
                fprintf(ap5,"%f %f ",time-S1*(s1_beats-7),ICaL);
                fprintf(ap5," \n");
                fprintf(ap6,"%f %f ",time-S1*(s1_beats-7),sO0);
            }
        }
    }
}

```

```

    fprintf(ap6, " \n");
    fprintf(ap7, "%f %f ", time-S1*(s1_beats-7), sRR);
    fprintf(ap7, " \n");
    fprintf(ap8, "%f %f ", time-S1*(s1_beats-7), Irel);
    fprintf(ap8, " \n");
    fprintf(ap9, "%f %f ", time-S1*(s1_beats-7), Iup);
    fprintf(ap9, " \n");
    fprintf(ap10, "%f %f ", time-S1*(s1_beats-7), IKr);
    fprintf(ap10, " \n");
    fprintf(ap11, "%f %f ", time-S1*(s1_beats-7), IKs);
    fprintf(ap11, " \n");
    fprintf(ap12, "%f %f ", time-S1*(s1_beats-7), IKl);
    fprintf(ap12, " \n");
    fprintf(ap13, "%f %f ", time-S1*(s1_beats-7), INaCa);
    fprintf(ap13, " \n");
    fprintf(ap14, "%f %f ", time-S1*(s1_beats-7), INaK);
    fprintf(ap14, " \n");
    fprintf(ap15, "%f %f ", time-S1*(s1_beats-7), IpK);
    fprintf(ap15, " \n");
    fprintf(ap16, "%f %f ", time-S1*(s1_beats-7), IbNa);
    fprintf(ap16, " \n");
    fprintf(ap17, "%f %f ", time-S1*(s1_beats-7), IbCa);
    fprintf(ap17, " \n");
    fprintf(ap18, "%f %f ", time-S1*(s1_beats-7), IpCa);
    fprintf(ap18, " \n");
    fprintf(ap19, "%f %f ", time-S1*(s1_beats-7), Nai);
    fprintf(ap19, " \n");
    fprintf(ap20, "%f %f ", time-S1*(s1_beats-7), I_kur);
    fprintf(ap20, " \n");
    fprintf(ap21, "%f %f ", time-S1*(s1_beats-7), Ki);
    fprintf(ap21, " \n");
    fprintf(ap23, "%f %f ", time-S1*(s1_beats-7), Cai);
    fprintf(ap23, " \n");
    fprintf(ap24, "%f %f ", time-S1*(s1_beats-7), CaSS);
    fprintf(ap24, " \n");
    fprintf(ap25, "%f %f ", time-S1*(s1_beats-7), CaSR);
    fprintf(ap25, " \n");
    fprintf(ap32, "%f %f ", time-S1*(s1_beats-7), Ixfer);
    fprintf(ap32, " \n");
}
    k++;
}
}
    tbegin = tbegin + S1;
}
fclose(ap1);
fclose(ap2);
fclose(ap4);
fclose(ap5);
fclose(ap6);
fclose(ap7);
fclose(ap8);
fclose(ap9);
fclose(ap10);
fclose(ap11);
fclose(ap12);
fclose(ap13);
fclose(ap14);
fclose(ap15);
fclose(ap16);
fclose(ap17);
fclose(ap18);
fclose(ap19);
fclose(ap20);
fclose(ap21);
fclose(ap23);
fclose(ap24);
fclose(ap25);
fclose(ap32);
}

```



```
int main ()  
{  
    Current_Contentions ();  
  
    return 0;  
}
```
